# Supplementary material for: Real-World Results from Combined Screening for Monogenic Genomic Health Risks and Reproductive Risks in 300 Adults
Source: MDPI journal article supplement (doi:10.3390/jpm12121962), 2022-11-28
Supplement: s1 [file s1]

| Gene Result |                                       | Count | DMD       | p.Val2159Serfs*4                                               | 1   | ASL      | p.Arg12Gln                   | 1  | CYP21A2 | p.Ile173Asn            | 1  |
|-------------|---------------------------------------|-------|-----------|----------------------------------------------------------------|-----|----------|------------------------------|----|---------|------------------------|----|
| Class Ia    |                                       | 51    | GBA       | p.Asn409Ser                                                    | 1   | ASPA     | p.Ala305Glu                  | 1  | CYP21A2 | p.Pro454Ser            | 6  |
| BRCA1       | p.Tyr1853*                            | 1     | HADHA     | p.Glu641Serfs*12                                               | 1   | ASPA     | p.Glu285Ala                  | 1  | CYP21A2 | p.Val282Leu            | 6  |
| BRCA2       | p.Gln1408*                            | 1     | HBB       | p.Glu7Val (HbS)                                                | 1   | ATP6V1B1 | p.Leu12Serfs*8               | 1  | DBT     | p.Arg301Cys            | 1  |
| BRCA2       | p.Gln2859*                            | 1     | MEFV      | p.Val744Ser                                                    | 1   | ATP7B    | p.Arg1319*                   | 1  | DHCR7   | c.964-1G>C (SA)        | 11 |
| BRCA2       | p.Glu2846Glyfs*22                     | 1     | MEFV      | p.Val726Ala                                                    | 3   | ATP7B    | p.Asp765Asn                  | 1  | DHCR7   | p.Trp151*              | 1  |
| BRCA2       | p.Ile2588Phefs*60                     | 1     | SERPINA1  | p.Arg63Cys (I allele)                                          | 2   | ATP7B    | p.Gly869Arg                  | 2  | DHCR7   | p.Val326Leu            | 1  |
| BRIP1       | p.Arg798*                             | 1     | SERPINA1  | p.Asp280Val (Null Cardiff allele)                              | 1   | ATP7B    | p.Thr991Met                  | 1  | DHDDS   | c.441-24A>G (I)        | 2  |
| BRIP1       | p.Ser895*                             | 1     |           |                                                                |     | BBS1     | p.Met390Arg                  | 3  | DNAH5   | exon 57-59 deletion    |    |
| CHEK2       | p.Ile157Thr                           | 3     | SERPINA1  | p.Glu366Lys (Z allele)                                         | 9   | BBS10    | p.Cys91Leufs*5               | 2  | DNAH5   | p.Arg4127His           | 1  |
| CHEK2       | p.Thr367Metfs*15                      | 2     | WNT10A    | p.Cys107*                                                      | 2   | BBS10    | p.Tyr559*                    | 1  | DNAI1   | c.48+2dup (I)          | 1  |
| DSC2        | c.631-2A>G (SA)                       | 1     | WNT10A    | p.Phe228Ile (LP)                                               | 9   | BCKDHA   | p.Arg117Cys (LP)             | 1  | DNAI2   | p.Asp597Valfs*8        | 1  |
| DSG2        | c.523+1G>A (SD)                       | 1     | Class If  |                                                                | 17  | BLM      | c.3558+1G>T                  | 1  | DYSF    | c.1053+1G>A            | 1  |
| DSG2        | p.Glu1020Alafs*18                     | 1     | CFTR      | p.Phe508del and c.1210-34TG[11]T[5] (I) (bi-allelic)           | 1   | BLM      | p.Arg899*                    | 1  | ERCC6   | p.Arg1087*             | 1  |
| F2          | c.*97G>A (c.20210G>A)                 | 5     |           |                                                                |     | BLM      | p.Gln627Arg                  | 1  | ETFDH   | p.Leu334Pro            | 1  |
| F5          | p.Arg534Gln (Leiden)                  | 14    | HFE       | p.Cys282Tyr (homozygous)                                       | 3   | BTDD     | p.Asp444His (PD)             | 23 | EYS     | c.2137+1G>A (SD)       | 1  |
| HOXB13      | p.Gly84Glu                            | 1     | HFE       | p.Cys282Tyr and p.His63Asp (bi-allelic)                        | 4   | BTDD     | p.Gly34Valfs*35              | 1  | EYS     | p.Gln171*              | 1  |
| LDLR        | c.2547+1G>A (SD)                      | 1     | HFE       | p.His63Asp (homozygous)                                        | 7   | CACNA1S  | p.Cys245Alafs*89             | 1  | EYS     | p.His263Thrfs*15       | 1  |
| LMNA        | p.Thr655Asnfs*49                      | 1     | HFE       | p.His63Asp (homozygous) (LP)                                   | 1   | CACNA1S  | p.Gln7*                      | 1  | EYS     | p.Thr2805Asnfs*7       | 1  |
| MITF        | p.Glu318Lys                           | 3     | SERPINA1  | p.Glu366Lys (Z allele) and p.Glu288Val (S allele) (bi-allelic) | 1   | CACNA1S  | p.Leu1612Trpfs*22            | 1  | F11     | p.Cys146*              | 1  |
| MYBPC3      | c.3628-41_3628-17del (I)              | 1     |           |                                                                |     | CAPN3    | p.Arg489Gln                  | 1  | F11     | p.Glu135*              | 1  |
| MYBPC3      | p.Glu542Gln (missense and splice)     | 1     | WNT10A    | p.Phe228Ile (homozygous) (LP)                                  | 1   | CAPN3    | p.Arg490Trp                  | 1  | F11     | p.Glu19Asnfs*3         | 1  |
| MYH7        | p.Lys865Arg                           | 1     |           |                                                                |     | CAV3     | p.Ala93Thr                   | 1  | FAH     | c.1062+5G>A (I)        | 1  |
| NF1         | p.Leu1183Arg (mosaic?)                | 1     | Class Ig  |                                                                | 1   | CBS      | p.Ile278Thr                  | 2  | FAH     | c.554-1G>T (SD)        | 1  |
| PKP2        | p.Thr50Serfs*61                       | 1     | FLNC      | deleted gene                                                   | 1   | CBS      | p.Pro49Leu                   | 1  | FANCA   | deletion (exons 11-29) | 1  |
| PMS2        | p.Lys706Serfs*19                      | 1     | Class Ila |                                                                | 504 | CDH23    | c.7482+2T>C                  | 1  | FANCG   | c.1480+1G>C (SD)       | 1  |
| PRKAR1A     | c.709-7_709-2del                      | 1     | ABCB11    | p.Arg487His                                                    | 1   | CDH23    | p.Arg1746Gln                 | 1  | FH      | p.Lys477dup            | 3  |
| SDHD        | p.Pro81Leu                            | 1     | ABCC8     | c.3989-9G>A (I)                                                | 1   | CDH23    | p.Leu1218Phefs*27            | 1  | FKRP    | p.Leu276Ile            | 1  |
| SERPINC1    | p.Pro73Leu                            | 2     | ACADM     | p.Lys329Glu                                                    | 3   | CDH23    | p.Thr1587Cysfs*4             | 1  | FKTN    | p.Cys137*              | 1  |
| TP53        | p.Pro151Arg (mosaic?)                 | 1     | ACADM     | p.Tyr337Ser                                                    | 1   | CERKL    | p.Pro287Leufs*10             | 1  | G6PC    | p.Arg83Cys             | 1  |
| Class Ib    |                                       | 1     | ACADVL    | p.Glu277del                                                    | 1   | CFTR     | c.1210-34TG[11]T[5] (I) (LP) | 13 | G6PC    | p.Gln27Argfs*9         | 1  |
| APOB        | p.Phe2656Thrfs*10                     | 1     | ACAT1     | p.Gly183Arg                                                    | 1   |          |                              |    | G6PC    | p.Gln319*              | 1  |
| Class Ic    |                                       | 2     | ACSF3     | p.Arg558Trp                                                    | 4   | CHRNAE   | p.Tyr35His                   | 1  | G6PC    | p.Gln347*              | 1  |
| G6PD        | p.[Val68Met Asn126Asp] (A- haplotype) | 2     | ACSF3     | p.Glu359Lys                                                    | 1   | CLN3     | p.Arg405Trp                  | 1  | GAA     | c.-32-13T>G (I)        | 3  |
| Class Id    |                                       | 49    | AGXT      | p.Phe152Ile                                                    | 1   | CLN5     | p.Trp224*                    | 1  | GAA     | p.Arg281Gln            | 1  |
| ATM         | p.Arg2034*                            | 1     | AGXT      | p.Trp108Arg                                                    | 1   | CNGB3    | p.Glu336*                    | 1  | GAA     | p.Arg281Trp            | 1  |
| ATM         | p.Glu522Ilefs*43                      | 1     | AIRE      | p.Leu323Serfs*51                                               | 1   | CNGB3    | p.Pro94Leufs*30              | 1  | GAA     | p.Asp404Asn            | 1  |
| ATM         | p.Leu2463fs                           | 1     | ALDOB     | p.Ala150Pro                                                    | 3   | COL7A1   |                              |    |         |                        |    |

Supplemental Table S1: All gene results, by clinical class.

|               |                       |    |                 |                      |   |                 |                             |          |                 |                                  |          |
|---------------|-----------------------|----|-----------------|----------------------|---|-----------------|-----------------------------|----------|-----------------|----------------------------------|----------|
| <i>GBE1</i>   | p.Tyr329Cys           | 1  | <i>MUTYH</i>    | p.Arg274Gln          | 2 | <i>SERPINA1</i> | p.Glu288Val (S allele) (LP) | 27       | <i>CYP21A2</i>  | c.293-13C>G (I) and              | 1        |
| <i>GCDH</i>   | p.Met191Thr           | 1  | <i>MUTYH</i>    | p.Gly396Asp          | 4 | <i>SGCB</i>     | p.Ser114Phe                 | 2        |                 | p.Gly111Valfs*21 and             |          |
| <i>GJB2</i>   | p.Gly12Valfs*2        | 4  | <i>MUTYH</i>    | p.Tyr179Cys          | 2 | <i>SGCG</i>     | Deleted gene                | 1        |                 | p.[Ile237Asn Val238Glu           |          |
| <i>GJB2</i>   | p.Leu56Argfs*26       | 2  | <i>MYO7A</i>    | p.Arg1240Gln         | 1 | <i>SGSH</i>     | p.Met1?                     | 1        |                 | Met240Lys] and                   |          |
| <i>GJB2</i>   | p.Leu90Pro            | 2  | <i>MYO7A</i>    | p.Arg634*            | 1 | <i>SLC12A3</i>  | c.506-1G>A                  | 1        |                 | p.Ile173Asn and                  |          |
| <i>GJB2</i>   | p.Met34Thr            | 12 | <i>NBN</i>      | p.Lys233Serfs*5      | 1 | <i>SLC22A5</i>  | c.-149G>A (NC)              | 2        |                 | p.Leu308Phefs*6 and              |          |
| <i>GJB2</i>   | p.Val37Ala            | 1  | <i>NEB</i>      | c.12331-1G>A (SA)    | 1 | <i>SLC22A5</i>  | p.Ala214Val                 | 1        |                 | p.Pro31Leu (in cis)              |          |
| <i>GLDC</i>   | deletion (exons 1-15) | 1  | <i>NEB</i>      | p.Trp3603*           | 1 | <i>SLC22A5</i>  | p.Pro46Ser                  | 1        | <i>CYP21A2</i>  | p.Gln319* and gene               | 2        |
| <i>GLDC</i>   | p.Arg739His           | 1  | <i>NR2E3</i>    | c.119-2A>C (SA)      | 1 | <i>SLC25A15</i> | p.Glu180Lys                 | 1        |                 | duplication (phase               |          |
| <i>GLDC</i>   | p.Pro345Thr           | 1  | <i>NTHL1</i>    | p.Gln90*             | 1 | <i>SLC26A4</i>  | c.1001+1G>A (SD)            | 1        |                 | unknown)                         |          |
| <i>GLE1</i>   | p.Arg569His           | 1  | <i>OAT</i>      | p.Arg398*            | 1 | <i>SLC26A4</i>  | p.Glu384Gly                 | 1        |                 | <b>Class IIc</b>                 | <b>1</b> |
| <i>GNPTAB</i> | p.Leu1168Glnfs*5      | 2  | <i>PAH</i>      | c.1315+1G>A          | 1 | <i>SLC26A4</i>  | p.Gly209Val                 | 2        | <i>SERPINA1</i> | p.Glu288Val (S allele)           | 1        |
| <i>GRHPR</i>  | p.Asp35Thrfs*11       | 2  | <i>PAH</i>      | p.Arg408Trp          | 2 | <i>SLC37A4</i>  | p.Ala113Glyfs*18            | 1        |                 | (homozygous) (LP)                |          |
| <i>HBA1</i>   | CNV x4                | 1  | <i>PAH</i>      | p.Glu280Lys          | 1 | <i>SLC37A4</i>  | p.Leu116Glyfs*31            | 1        |                 | <b>Class IIIa</b>                | <b>3</b> |
| <i>HBA1</i>   | deleted gene          | 5  | <i>PAH</i>      | p.Pro281Leu          | 1 | <i>SLC37A4</i>  | p.Trp96*                    | 1        | <i>ASS1</i>     | p.Val269Met and                  | 1        |
| <i>HBA2</i>   | deleted gene          | 2  | <i>PAH</i>      | p.Val230Ile          | 1 | <i>SLC7A7</i>   | deletion (exons 4-5)        | 1        |                 | p.Gly390Arg (bi-allelic          |          |
| <i>HBB</i>    | p.Gly70Ser            | 1  | <i>PCDH15</i>   | p.Arg1106*           | 1 | <i>SMARCA11</i> | p.Glu848*                   | 1        |                 | phase unknown)                   |          |
| <i>HEXA</i>   | c.1073+1G>A           | 1  | <i>PCDH15</i>   | p.Arg245*            | 1 | <i>SMARCA11</i> | p.Phe279Ser                 | 1        | <i>CYP21A2</i>  | p.Val282Leu (zygosity            | 1        |
| <i>HEXA</i>   | c.805+1G>A            | 1  | <i>PEX1</i>     | p.Arg949Gln          | 1 | <i>SMN1</i>     | c.*3+80T>G (g.27134T>G)     | 1        |                 | uncertain)                       |          |
| <i>HFE</i>    | p.Cys282Tyr           | 23 | <i>PEX1</i>     | p.Ile700Tyrfs*42     | 2 |                 | (ICR)                       |          |                 | p.Leu308Phefs*6                  |          |
| <i>HFE</i>    | p.His63Asp (LP)       | 69 | <i>PEX12</i>    | p.Tyr74*             | 1 | <i>SMN1</i>     | deleted gene                | 8        |                 | p.Arg357Trp as well as           |          |
| <i>HGD</i>    | p.Gly161Arg           | 1  | <i>PEX6</i>     | p.Leu614Argfs*5      | 1 | <i>SMPD1</i>    | p.Asp253His                 | 1        |                 | p.Ile237Asn, p.Val238Glu,        |          |
| <i>HGD</i>    | p.Met368Val           | 1  | <i>PEX7</i>     | p.Gly217Arg          | 1 | <i>SMPD1</i>    | p.Gly244Arg                 | 1        |                 | p.Met240Lys (phase               |          |
| <i>HJV</i>    | p.Gly302Val           | 1  | <i>PEX7</i>     | p.Leu292*            | 2 | <i>TGM1</i>     | p.Trp263                    | 1        |                 | unknown)                         |          |
| <i>HOGA1</i>  | c.700+5G>T (I)        | 3  | <i>PFKM</i>     | c.237+1G>A (SD)      | 1 | <i>TMEM216</i>  | p.Asn121Glufs*15            | 1        | <i>DNAH5</i>    | c.2744-1G>T and                  | 1        |
| <i>HOGA1</i>  | p.Ala36Val            | 1  | <i>PKHD1</i>    | c.390+1G>T (SD)      | 1 | <i>TPP1</i>     | p.Arg208*                   | 1        |                 | p.Arg36Glyfs*8 (bi-allelic       |          |
| <i>HPS3</i>   | p.Arg397Trp           | 1  | <i>PKHD1</i>    | p.Ala1254Glyfs*49    | 1 | <i>TPP1</i>     | p.Lys18*                    | 1        |                 | phase unknown)                   |          |
| <i>HPS3</i>   | p.Gly146*             | 1  | <i>PKHD1</i>    | p.Arg494*            | 1 | <i>TRMU</i>     | p.Leu195Ilefs*12            | 1        |                 |                                  |          |
| <i>IDUA</i>   | c.386-2A>G            | 1  | <i>PKHD1</i>    | p.Ile2331Lys         | 2 | <i>TYMP</i>     | p.Glu289Ala                 | 1        |                 | Abbreviations: SA – splice       |          |
| <i>LAMB3</i>  | p.Val948Cysfs*82      | 1  | <i>PKHD1</i>    | p.Thr36Met           | 1 | <i>TYMP</i>     | p.Val208Met                 | 1        |                 | acceptor, SD – splice donor, I – |          |
| <i>LIPA</i>   | p.Ser133*             | 1  | <i>PMM2</i>     | c.255+2T>C (SD)      | 1 | <i>USH1C</i>    | c.216G>A (Silent)           | 2        |                 | intronic, NC – non-coding, LP –  |          |
| <i>LPL</i>    | p.Arg197Cys           | 1  | <i>PMM2</i>     | p.Arg141His          | 6 | <i>USH1C</i>    | c.748_759+5del (SD)         | 1        |                 | low penetrance, PD – partial     |          |
| <i>LRPPRC</i> | p.Ala354Val           | 1  | <i>PMM2</i>     | p.Val67Gly           | 1 | <i>USH1C</i>    | deletion (exon 9)           | 1        |                 | deficiency, ICR – increased      |          |
| <i>MAN2B1</i> | p.Trp714Arg           | 1  | <i>POMGNT1</i>  | c.1539+1G>A (SD)     | 1 | <i>USH2A</i>    | c.949 C>A                   | 1        |                 | carrier risk                     |          |
| <i>MCC2</i>   | p.Gly475Arg           | 1  | <i>PPT1</i>     | p.Arg151*            | 2 | <i>USH2A</i>    | p.Arg205Glufs*11            | 1        |                 |                                  |          |
| <i>MCOLN1</i> | p.Thr232Pro           | 1  | <i>PYGM</i>     | p.Arg50*             | 1 | <i>USH2A</i>    | p.Arg4192His                | 1        |                 |                                  |          |
| <i>MED17</i>  | p.Gln482*             | 1  | <i>PYGM</i>     | p.Lys754Asnfs*49     | 1 | <i>USH2A</i>    | p.Glu3562*                  | 1        |                 |                                  |          |
| <i>MKS1</i>   | p.Cys492Trp           | 1  | <i>PYGM</i>     | p.Phe599Leufs*6      | 1 | <i>USH2A</i>    | p.Glu767Serfs*21            | 1        |                 |                                  |          |
| <i>MKS1</i>   | p.Gln408*             | 1  | <i>RAPSN</i>    | p.Asn88Lys           | 3 | <i>USH2A</i>    | p.Ile1183Phefs*19           | 1        |                 |                                  |          |
| <i>MLC1</i>   | deletion (exon 3)     | 1  | <i>RMRP</i>     | n.-17_-2dup (NC,     | 1 | <i>USH2A</i>    | p.Ile5166Val                | 1        |                 |                                  |          |
| <i>MMAA</i>   | p.Arg145*             | 1  |                 | promoter)            |   | <i>USH2A</i>    | p.Trp3955*                  | 1        |                 |                                  |          |
| <i>MMACHC</i> | p.Arg91Lysfs*14       | 1  | <i>RMRP</i>     | n.-25_-3dup (NC)     | 1 | <i>VPS13B</i>   | c.10942+1G>A (SD)           | 1        |                 |                                  |          |
| <i>MPL</i>    | p.Lys553Argfs*77      | 1  | <i>RMRP</i>     | n.71A>G (RNA change) | 1 | <i>XPA</i>      | p.Gln185His                 | 1        |                 |                                  |          |
| <i>MPV17</i>  | p.Pro98Leu            | 1  | <i>RMRP</i>     | NR_003051.3:n.239C>T | 1 |                 |                             |          |                 |                                  |          |
| <i>MSH3</i>   | deletion (exon 16)    | 1  |                 | (RNA Change)         |   |                 |                             |          |                 |                                  |          |
| <i>MTHFR</i>  | p.Arg52Gln            | 1  | <i>RPGRIP1L</i> | p.Arg1177*           | 1 |                 |                             |          |                 |                                  |          |
| <i>MUT</i>    | p.Ala676Thr           | 1  | <i>SACS</i>     | deleted gene         | 1 |                 |                             |          |                 |                                  |          |
|               |                       |    |                 |                      |   |                 | <b>Class IIb</b>            | <b>3</b> |                 |                                  |          |
